# Supplementary material for: Application of next-generation sequencing for the high-resolution typing of MHC-B in Korean native chicken
Source: Frontiers journal article supplement (doi:10.3389/fgene.2022.886376), 2022-10-28

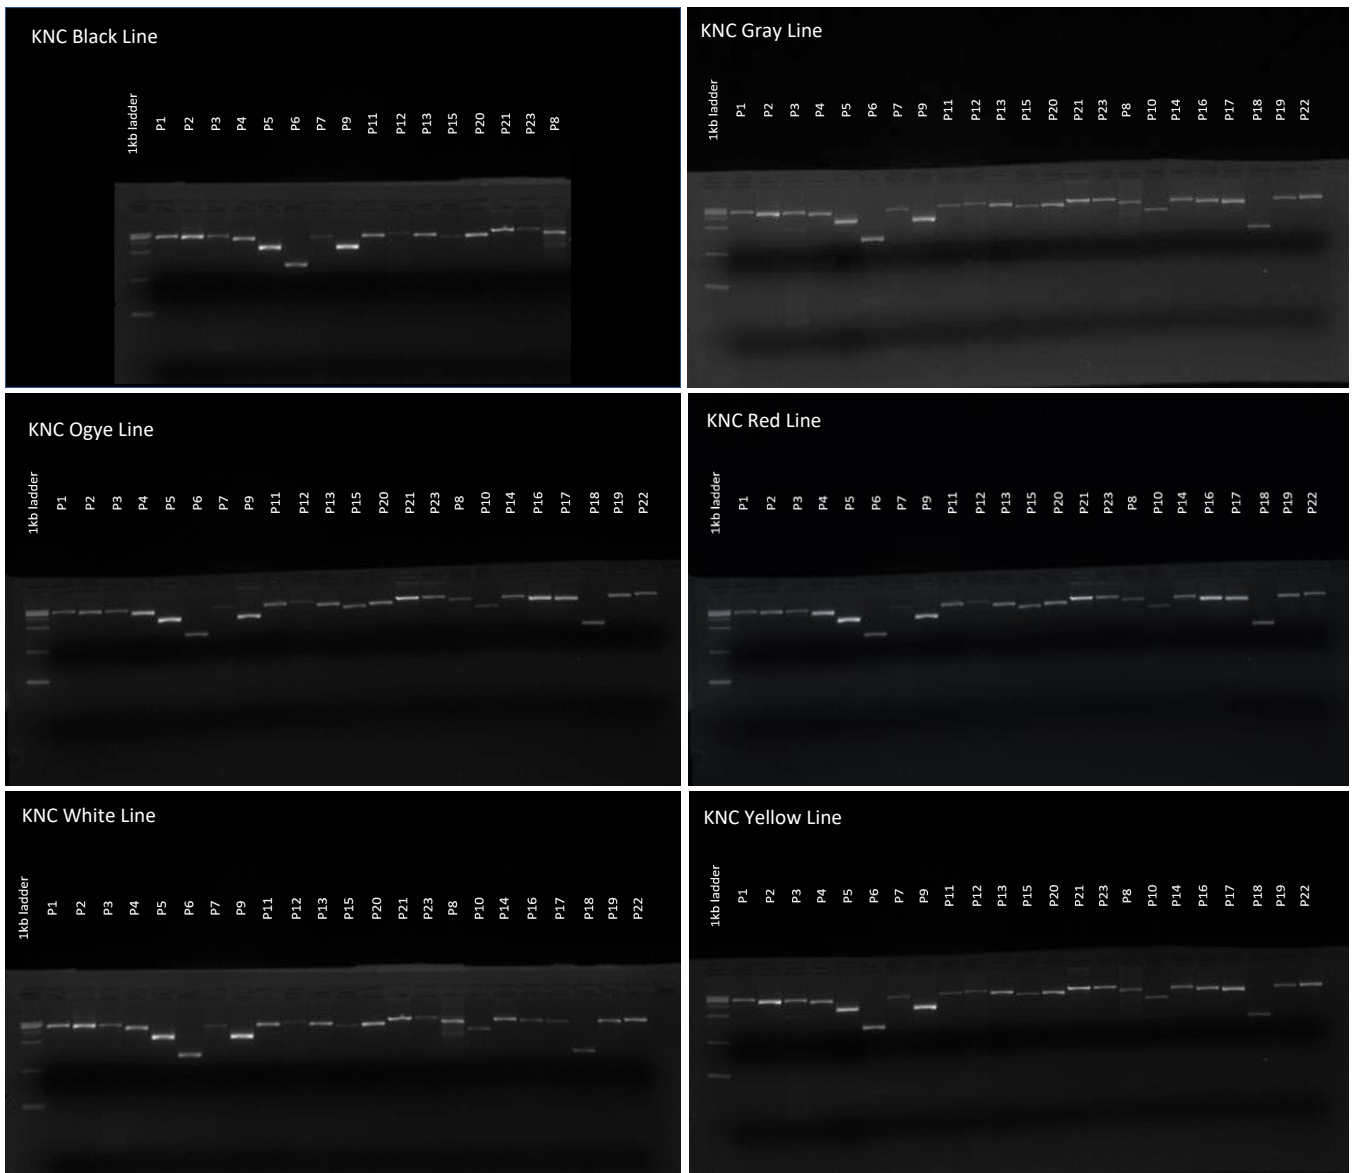

Supplementary Figure 1. Agarose gel electrophoresis images of long-range PCR amplification of MHC-*B* region for all the six KNC lines (23 primer pairs have been used to amplify the MHC-*B* region of KNC lines except the black line (the first line sequenced))

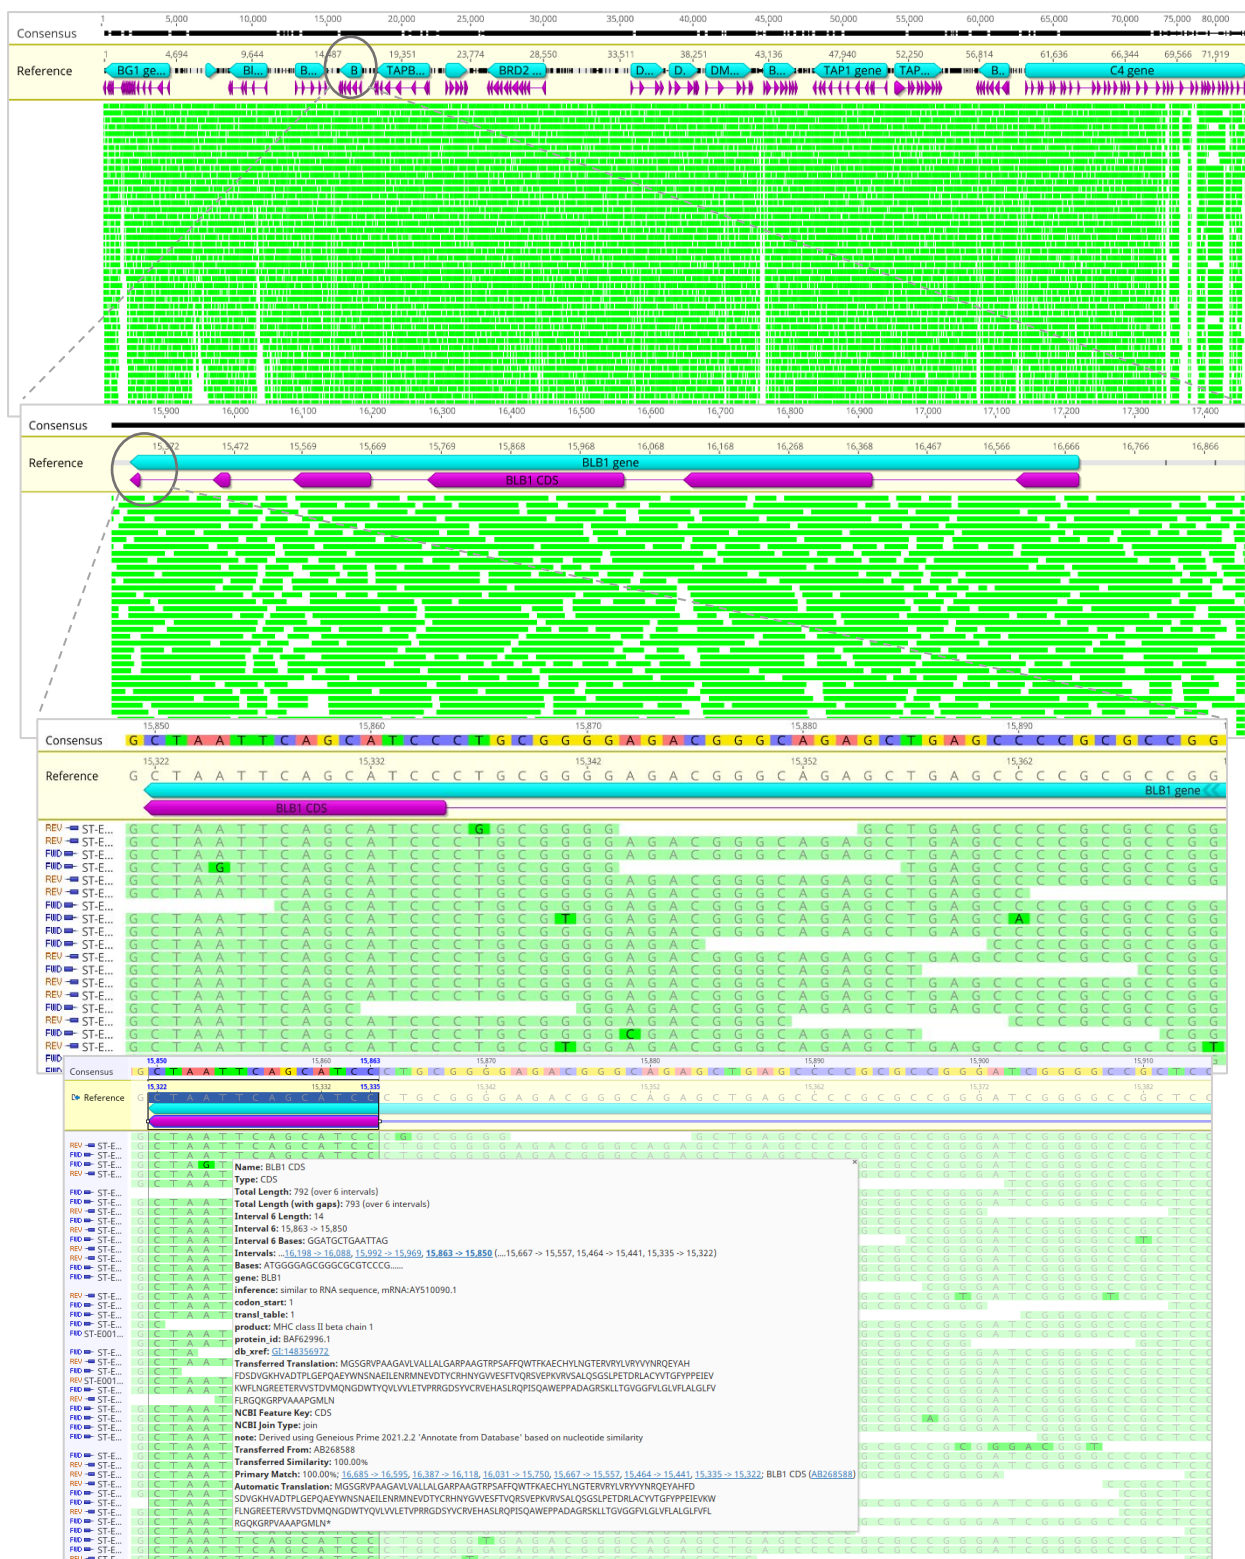

Supplement: Presentation_1.pdf [file Presentation_1.pdf]
